# Supplementary material
Source: PubMed Central journal article supplement (PMC2323262)
Supplement: emboj200841s1.pdf [file emboj200841s1.pdf]

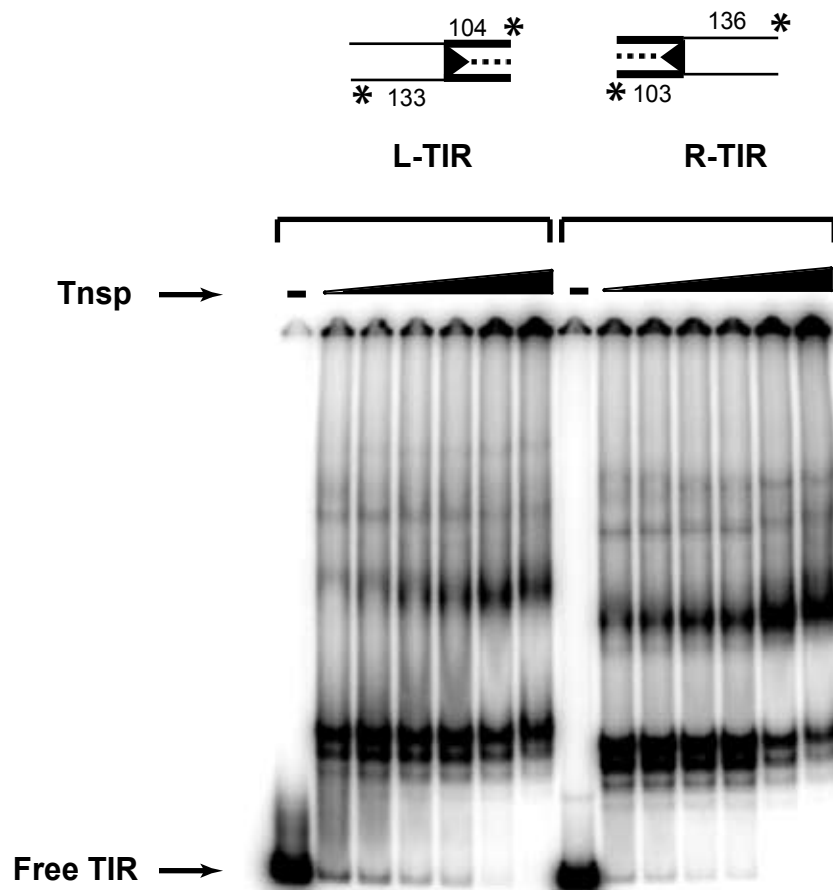

A

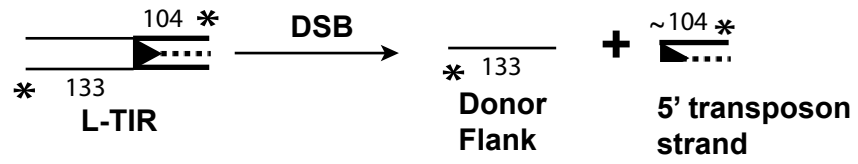

Time (min) 0 1 2 5 10 20

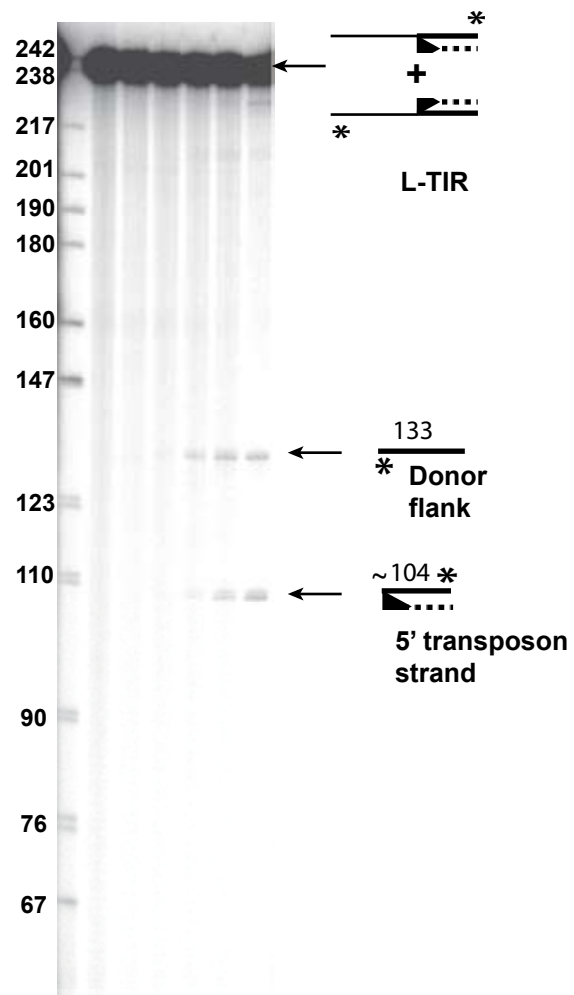

B

Time (min) 0 1 2 5 10 20

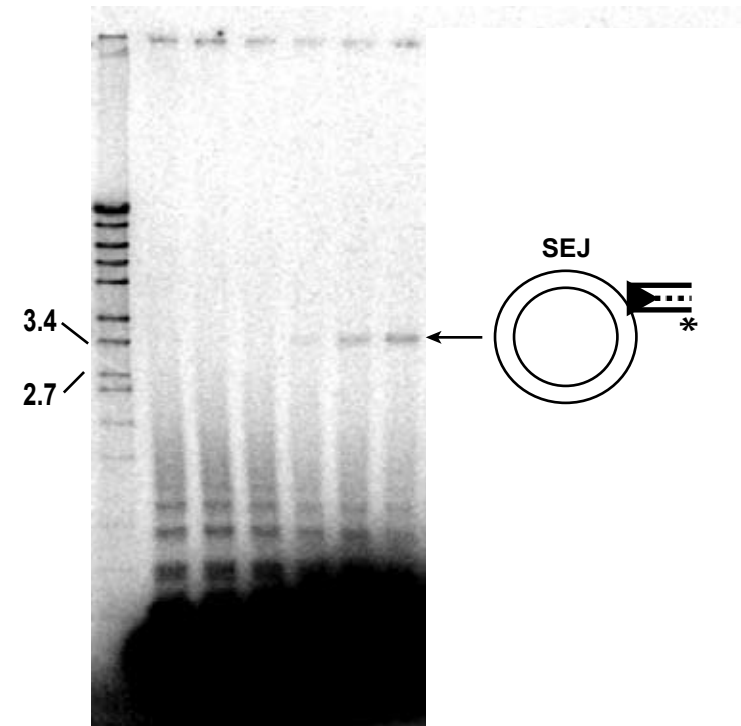

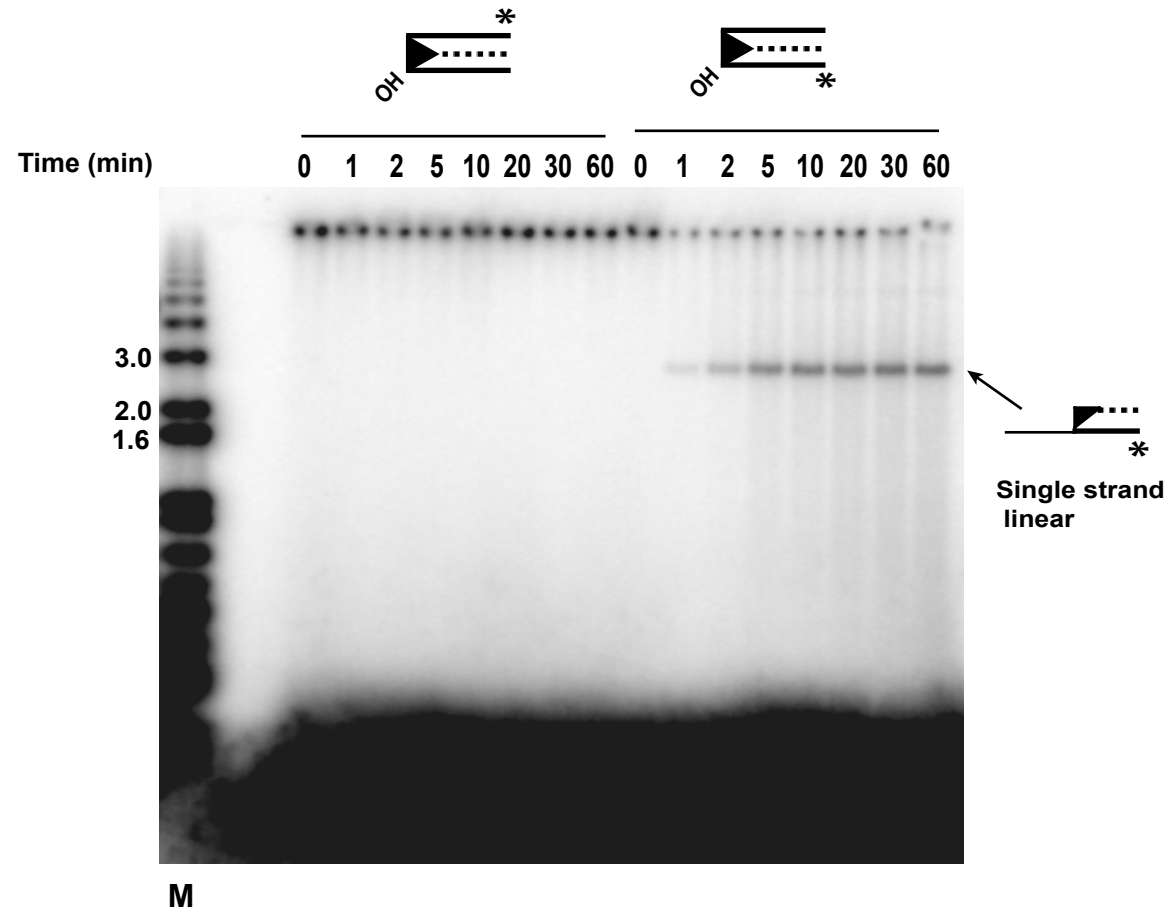

|                                                            |    |
|------------------------------------------------------------|----|
| Total number of transposition reactions                    | 4  |
| No of colonies sequenced from each transposition reactions | 5  |
| Total number of colonies sequenced                         | 20 |

CAACGCAATTAA CCC GGG TTAATGTGCGTT  
GTTGCGTTAATT GGG CCC AATTACACTCAA

CCGCATAGTTAA CCC GGG TTAAGCCAGCCC  
GGCGTATCAATT GGG CCC AATTCTGGTCGGG

TTTATAGGTTAA CCC GGG TTAATGTCATGA  
AATTATCCAATT GGG CCC AATTACAGTACT

CCGATTCATTAA CCC GGG TTAATGCAGCTG  
GGCTAAGTAATT GGG CCC AATTACGTTCGAC

AAAATCCCTTAA CCC GGG TTAACGTGAGTT  
TTTTAGGGAATT GGG CCC AATTGCACTCAA

AAAATCCCTTAA CCC GGG TTAACGTGAGTT  
TTTTAGGGAATT GGG CCC AATTGCACTCAA

AGATTGATTTAA CCC GGG TTAAACTTTCAT  
TCTAACTAAATT GGG CCC AATTTTGAAGTA

TTTTTAATTTAA CCC GGG TTAAAAGGATCT  
AAAAATTAAATT GGG CCC AATTTTCCTAGA

A

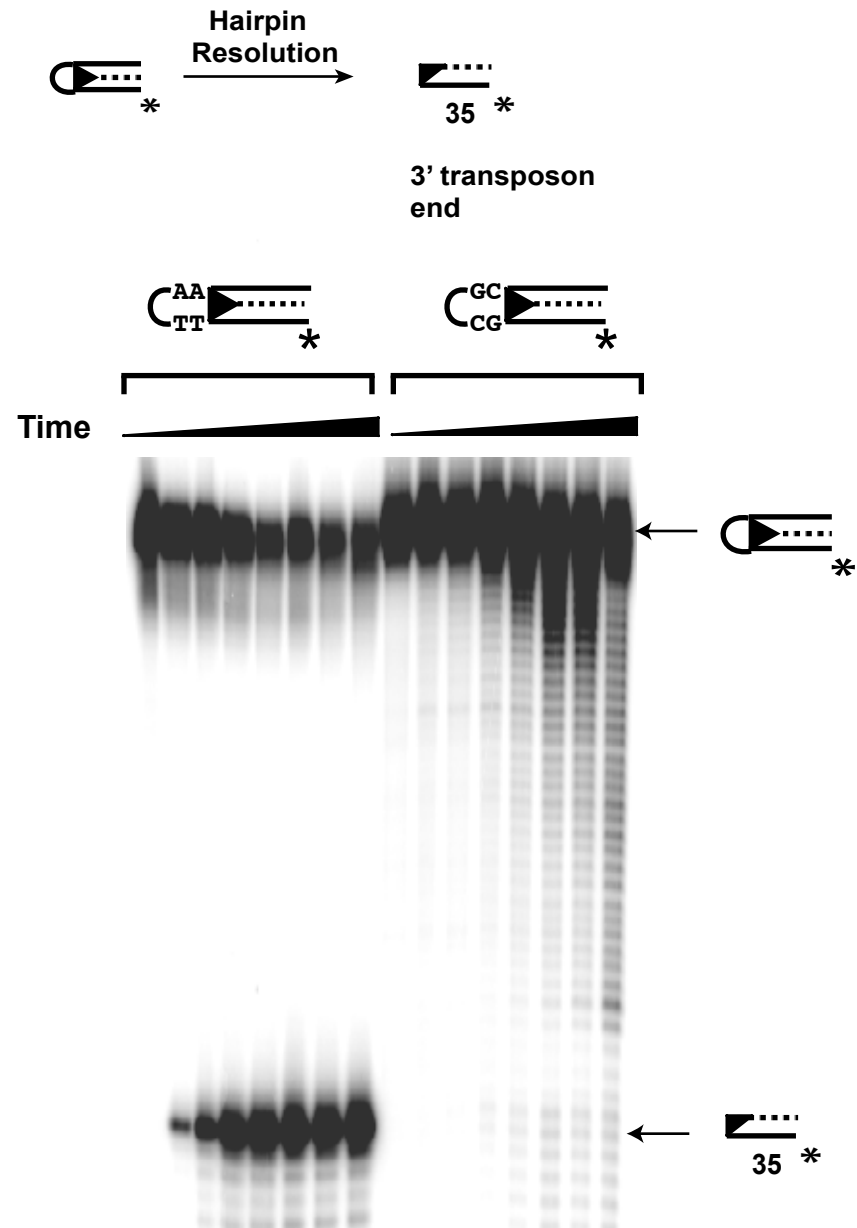

B

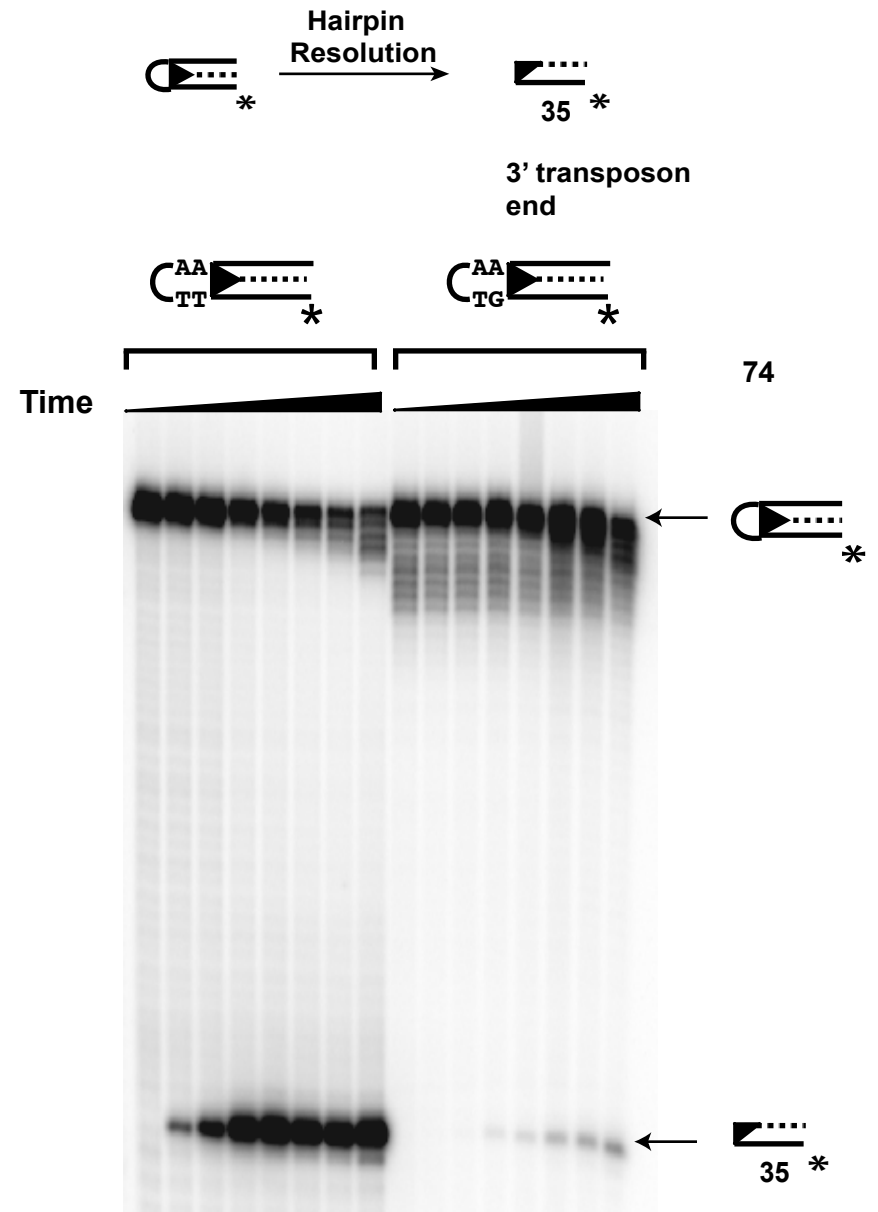

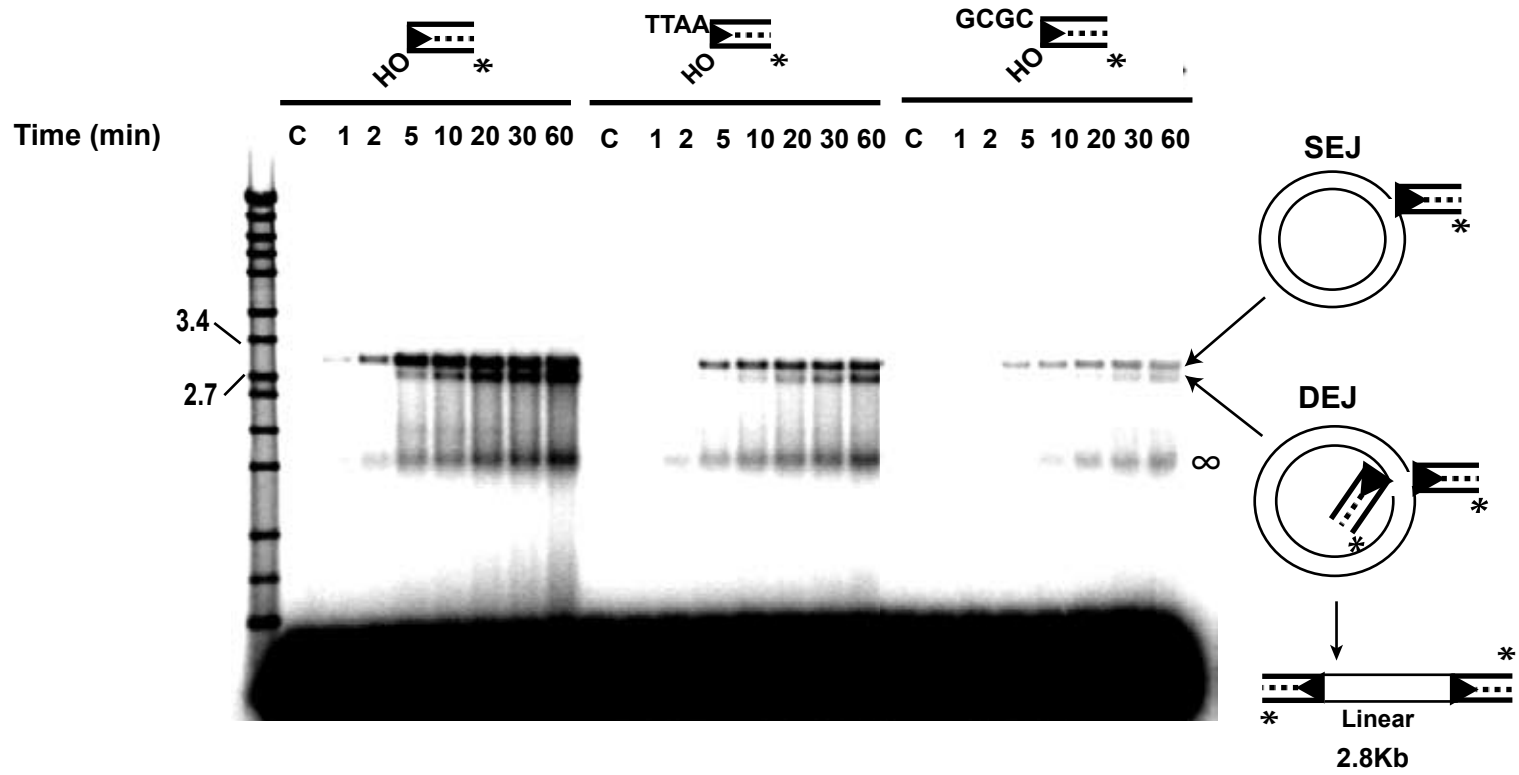

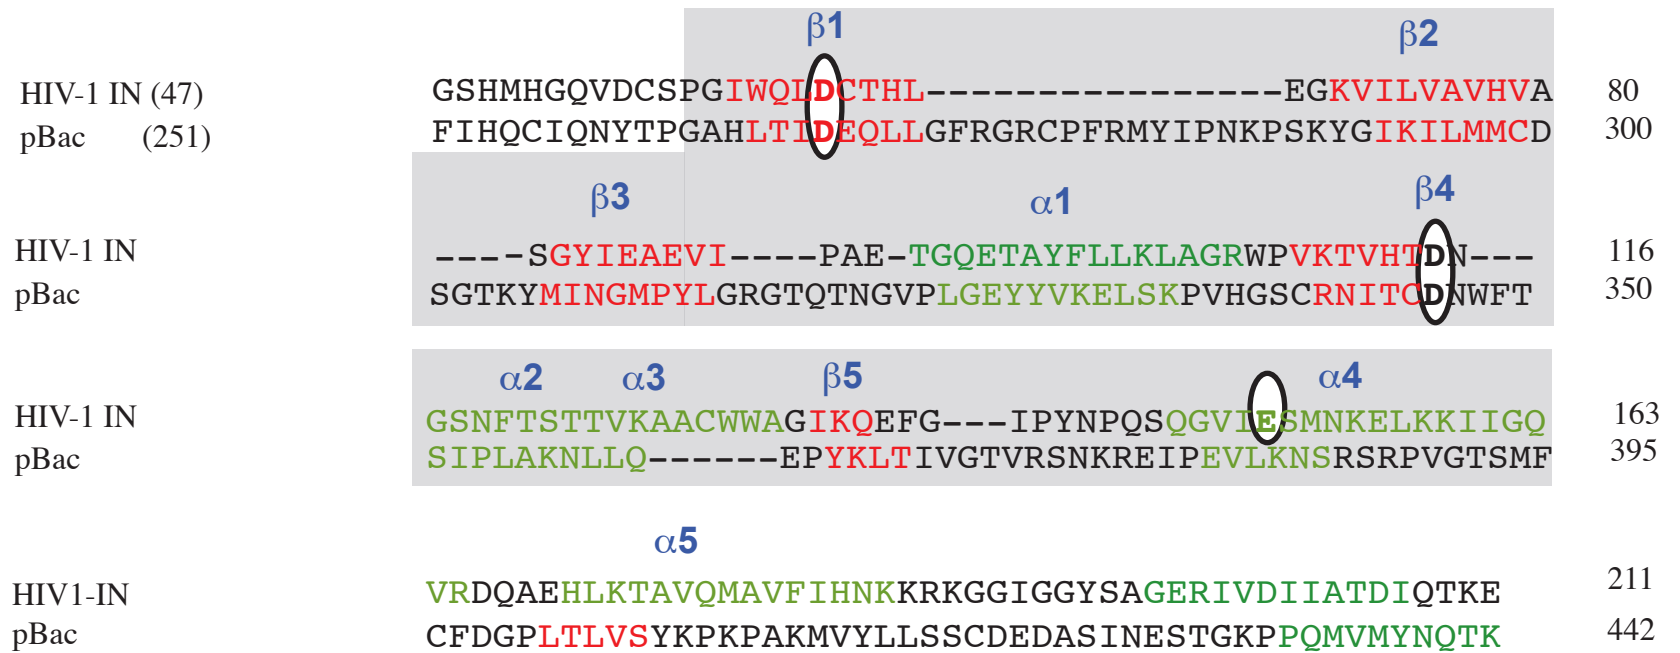

**D227    D228    D239**

Adineta --GWINEKSRKILIFV--NRSPLESPNIQSYHVKNRFETI ISSIQFDNKTAREERKRTDKF 209  
Adineta\_1 LAGLLGRLRSDLHSLW--RTSPLESPIFKDTISKSRFDKIIACLRFDKSTREERKKADKF 202  
Anopheles IRGATESKGMIDLW--SEKYGLPFCKNVMSRNRFRIMKFLRFDEKSTRSQRLOTDKF 240  
Bombyx LAGLIKSNRQSLKDLW--RTDGTGVDIFRRTMSLQRFQFLQNNIRFDDKSTRDERKQTDNM 258  
Ciona LTGVVHKRG--KLESYWIKNSMIETPYFGKMSRNRQAITGFLHFNDNEKLAENIDNDKL 211  
Heliothis MSGVLRSSHLNFKDLW--ATDGTGIEFFQNTMSFNRF LFISRCVRFDDKNTKSERLKTDKL 232  
Takifugu LAGVFRSKGESAESLW--DAE--TGREIFRATMSLENFHIISRIIRFDNZDDRRPARWORDKL 237  
T.ni MTAVRKDNHMSTDDL F---DRSLSMVYVSVMSRDRFDFLIRCLRMDDKSIRPTLRENDVF 241

**D268**

Adineta AVSREIWTDFSRKFKEMYNPGSHGTIDERLLGFRGKCPFRQYIPSKPKDYAIKFWFCVDV 269  
Adineta\_1 AAIREIWLDFQDKLKTCTYTPGLNITIDEQLLGFGRGKCPFRQFIPTKPKDYGLKFWLCVDA 262  
Anopheles ALISDVFSRFSVNCQNTYVPGPHISVDEQLFPSKTRCPFTQFMASKPKDYGQKYWMAVDV 300  
Bombyx AAFRSIFDQFVQCCQNAYSPEFLTIDEMLLSFRGRCLFRVYIPNPKPAKYGIKILALVDA 318  
Ciona YKVRPVYDLIVARWKALYNLGEHISIDEGMMKWRGRLGFRVYNKDKPIKYGIKSYILADS 271  
Heliothis AAVREFTDLMNNNF INNYCASENVTLDEQLPAFRGRFSGVVYMPNKPTKYGIKHYALVDS 292  
Takifugu GVIRTVWDKVVRRLLPLYNPGPNVTIDEQLMPFRGRCPFLQYLPSKPAKNGIKIWAACDA 297  
T.ni TPVRKIWDLFIHQCIQNYTPGAHLTIDEQLLGFGRGCPFRMYIPNPKPSKYGIKILMMCD 301

**D346**

Adineta NSYYIFDAFPYIERQP--NEHRQRFVGPVNVLELMKPMYGSNRNVTIDNFFTSIHLAKEL-- 327  
Adineta\_1 ESYVVLNAFPYIGRQP--GOEKQAHVGESVLELLRPFYGSNRNVTIDNFFTSVPLARNL-- 320  
Anopheles DSKYVVNIIPYLGKND--ERPAEERLGDFVVKLVDPYLNRRNVTCDNFFTSLELAKFL-- 358  
Bombyx KNFYVVNLEVYAGKQPSGPYAVSNRPFVVERLIQPVARSHRNVTFDNWF TGYELMLHLL 378  
Ciona HSHYCWNLDMYH-----RVQKTLKETVSQILTSKCHFLWHSLYMDNFYNSVMSQML-- 323  
Heliothis ATFYLLKFEIYAGVQPEGPYRMPNDTVSLVKRMTEPIWGTGRNVTMDNWF TSVPLANILL 352  
Takifugu TSSYAWNLOVYTGKPD--GGAPEKNPRNESCPRHVSGTQWTQHH--MRHFF TSHKLGQEL-- 353  
T.ni GTKYMINGMPYLGRGTQ--TNGVPLGEYVVKELSKPVHGSCRNITCDNWF TSIPLAKNLL 359

Adineta -HSGKLTLVGTLRKNKPEIPIEFQSNKNRDVGSSIFGFS--DNLTLVSYVPKKNKAVILLS 385  
Adineta\_1 -QTKNLTLIGTLRKNKPEIPIEFLLSSKIREIGSSFLGFE--DNLALVSFVPKKNKAVLLLS 378  
Anopheles -KSKKTSLVGTINKARREVPICVKKVKEKLYFTKAFK--S--DDTTLTVYQGTKKNVLLS 415  
Bombyx -NEYRLTSVGTVRKNKRQIPESFIRTD--RQPNSSVFGFQ--KDITLVSYAPKKNKVVVMS 435  
Ciona -LAFQIHSVGTLSRNGEP--REIRTPPNQMKKGDIIARQNSVTVLAW---KDKRVVKAI 378  
Heliothis -KDHQLTMVGTIRKNKPEIPTCFQPKRTRTEHSSFLGFGQ--EDVTLCSYVPKKS KAVLLIS 410  
Takifugu -LKRKLTIVGTIRKNRSELPPQLLTSKNRPVKSSQFAYT--ADTSLVSYVPKKGKNVVLMS 411  
T.ni QEPYKLTIVGTVRSNKREIPEVLKNSRSPVGTSMFCFD--GPLTLVSYKPKPAKMVYLLS 418

**D447****D450****W465**

Adineta SMHHD SKV--DI-----GTGKPNIVLDYNSKSGAVDTIDEMCHKYSVCRGTRRWP 433  
Adineta\_1 SKHHDNHV--DN-----KTGKPVII LDYNTKKGAVDTVDQMCHKYTVKRGTKRWP 426  
Anopheles SMHRDIRTGND-----KSKPETVAFYNSTKYGVVDVDMCRKYSLSASRRWS 464  
Bombyx TMHHDNSIDEST-----G--EKQKPEITFYNSTKAGVDVDEL CANYNVSRNSKRWP 486  
Ciona STKHDASVTTITRRQRRGGEXESVEKPVCIADYNLHMSGVDQVDMISYYPCHRKSLKWT 438  
Heliothis SMHNDNNIVES-----EKKKPEIILYINSTKGGVDTNDQMCANYNVRRTKRWP 459  
Takifugu TLHRDGRMCDQ-----EHHKPEIIMDYNATKGGVDNMDKLVTAYSCKRRTL RWP 460  
T.ni SCDEDASI--NE-----STGKQPVMYYNQTKGGVDTLDQMCSVMTC SRKTNRWP 466

Adineta LCVFYGMIDAAA INAMSLWKKKNPNWNANKKYKRRLFLEELGTLT SYLLDFRIKNSS-- 491  
Adineta\_1 LCIFYGMIDMAALNAFILWKSKNPVWNNENKRYQRRLFLEELRLSLVTPLLDFRSKTSN-- 484  
Anopheles VHSFFNILDLAGINAWVLYKELT-----KENISRRDFLFLKGEELAE EYVENKSANAN-- 517  
Bombyx MTLFYGVNLMAAINACIIYRTN-----KNVTIKRTEFIRSLGLSMIYEHLSRNKKKN-- 539  
Ciona KKVFFYFMTISVHNAYILYKSKS-----SA--KSCKTLYSFI LTLVSQLCQODRLOPO-- 489  
Heliothis MVIFYHLLNVAGINAYVIFKNK-----IDHGISRREFLKH LAVDLVKVHQQTRSNIPO-- 512  
Takifugu LVIFFDMLDISAYNAFVIWMALNPEWKRVKLQKRRLFLEDLGKALVRPQIERRKHIPRTP 520  
T.ni MALLYGMINIACINSFIIYSH--NVSSKGEKVQSRKKFMRNLYMSLTSSFMKRLEAPT-- 523

**C558****C561**

Adineta ---TLHKDIQ--NALVRFVGYPRIETELE---TFVTDSARSKRKRCSLCDYSSDRKVSNT 542  
Adineta\_1 ---FLHKDIQ--NALLIVGHPVSKRDSQ---KSDEDSAQSKRKRCSICETS KDRKTSNK 535  
Anopheles ---LPM-----TNAGGSRRRYKVQTSCHEGKSANE 544  
Bombyx ---IPTYL RQ--RIEQQLGEPSP-----RHVNVPGRYVRCQDCPYKKDRKTKRS 583  
Ciona ---IDD-----ENLAGPPP KSPRIDS---TKRLKGGFKKHVIALYPP TKKKAAAQRP 535  
Heliothis ---LP--RAVQ--KRLKR---NAEVQDPG---STSRGGPSTSYKRCHICPRSKDKKIRFM 559  
Takifugu ASAAMVRRIQKENAGALSTQPTQPQSAEPEVNVZ XVVNSSNKKKRCEVCGPKMDRKTQYT 580  
T.ni ---LKRYLRD--NISNILPNEV--PGTSD---DSTEEMPV MKRRTYCTYCP SKIRRKANAS 573

**C574    C577    C582    H585    C590    C593**

Adineta CYKCSEPICKQHSMK--RVFRINCSK----- 566  
Adineta\_1 CYNCSAFVCS EHCVK--QIFCINCSK----- 559  
Anopheles CFTCNRPVCKCKTKRISYVCV SCEPGSDEAM 575  
Bombyx CNACAKPICMEHAK---FLCENCAE--LDSSL 610  
Ciona CRACMKNGCRKDTIL---L----- 551  
Heliothis CAKCHHHICH DHST---MICDKCID----- 581  
Takifugu CIKCKKYICNTHTVK---LWPSCVV----- 602  
T.ni CKKCKKVICREHNID---MCQSC--F----- 594



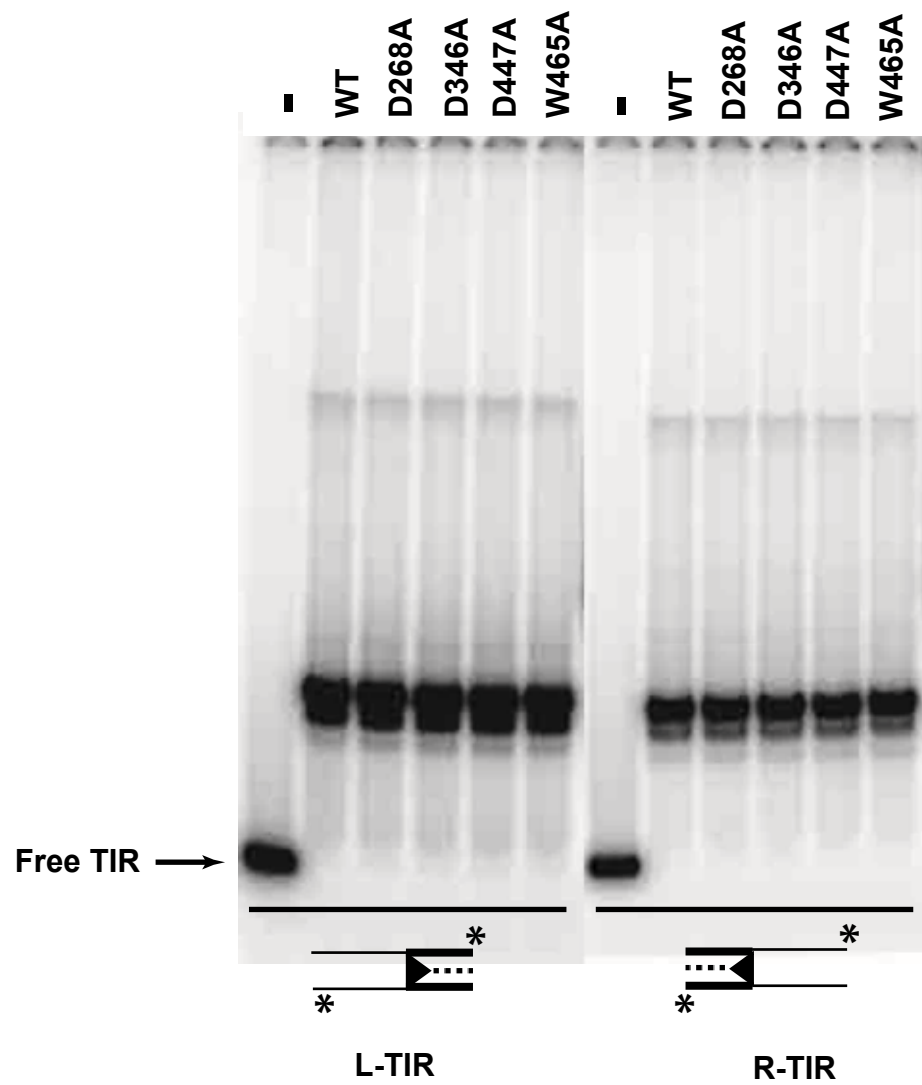

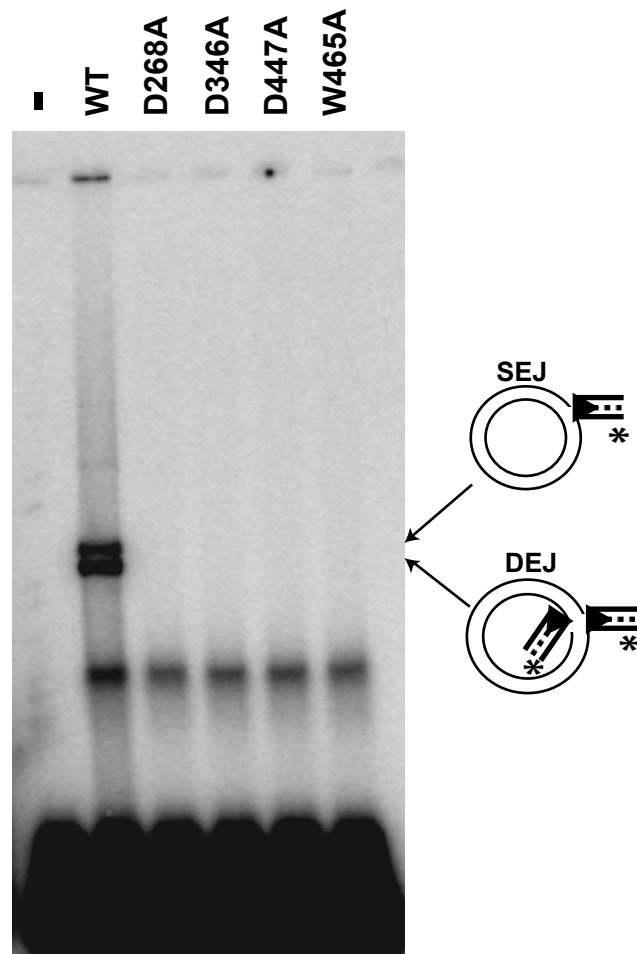

A

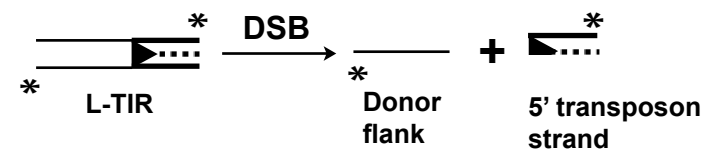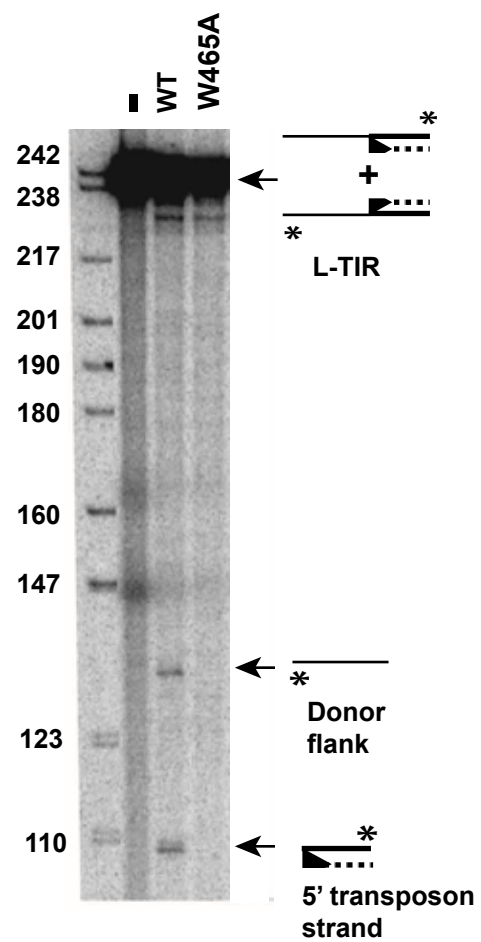

B

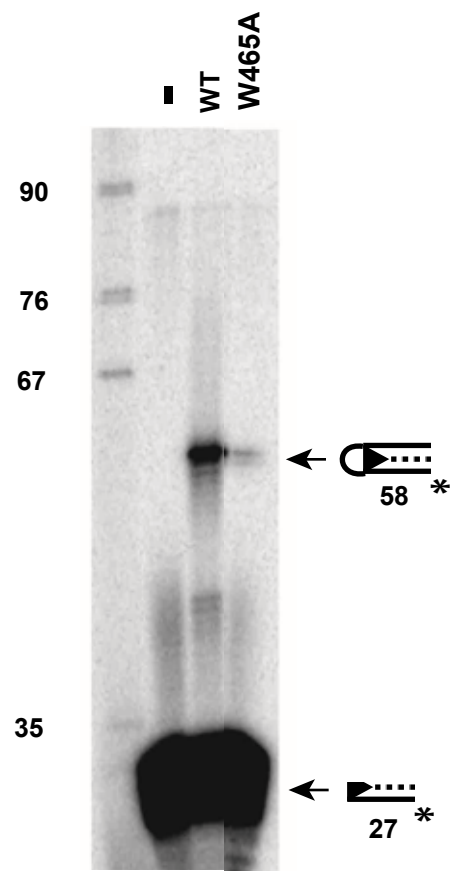

C

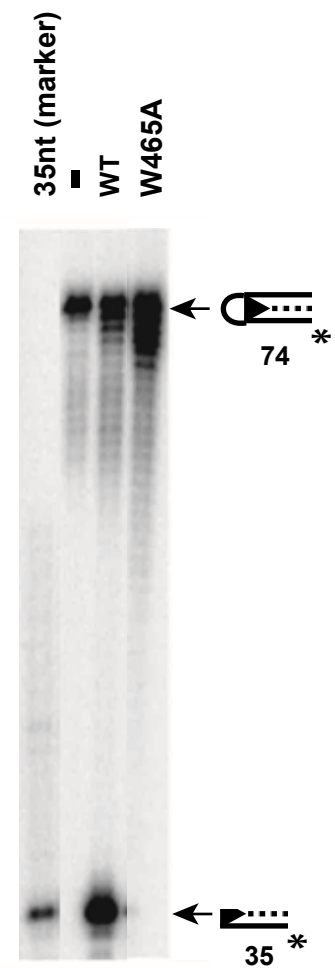

D

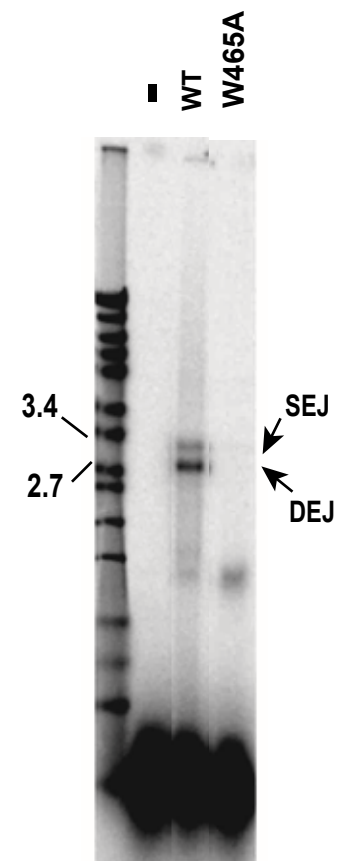

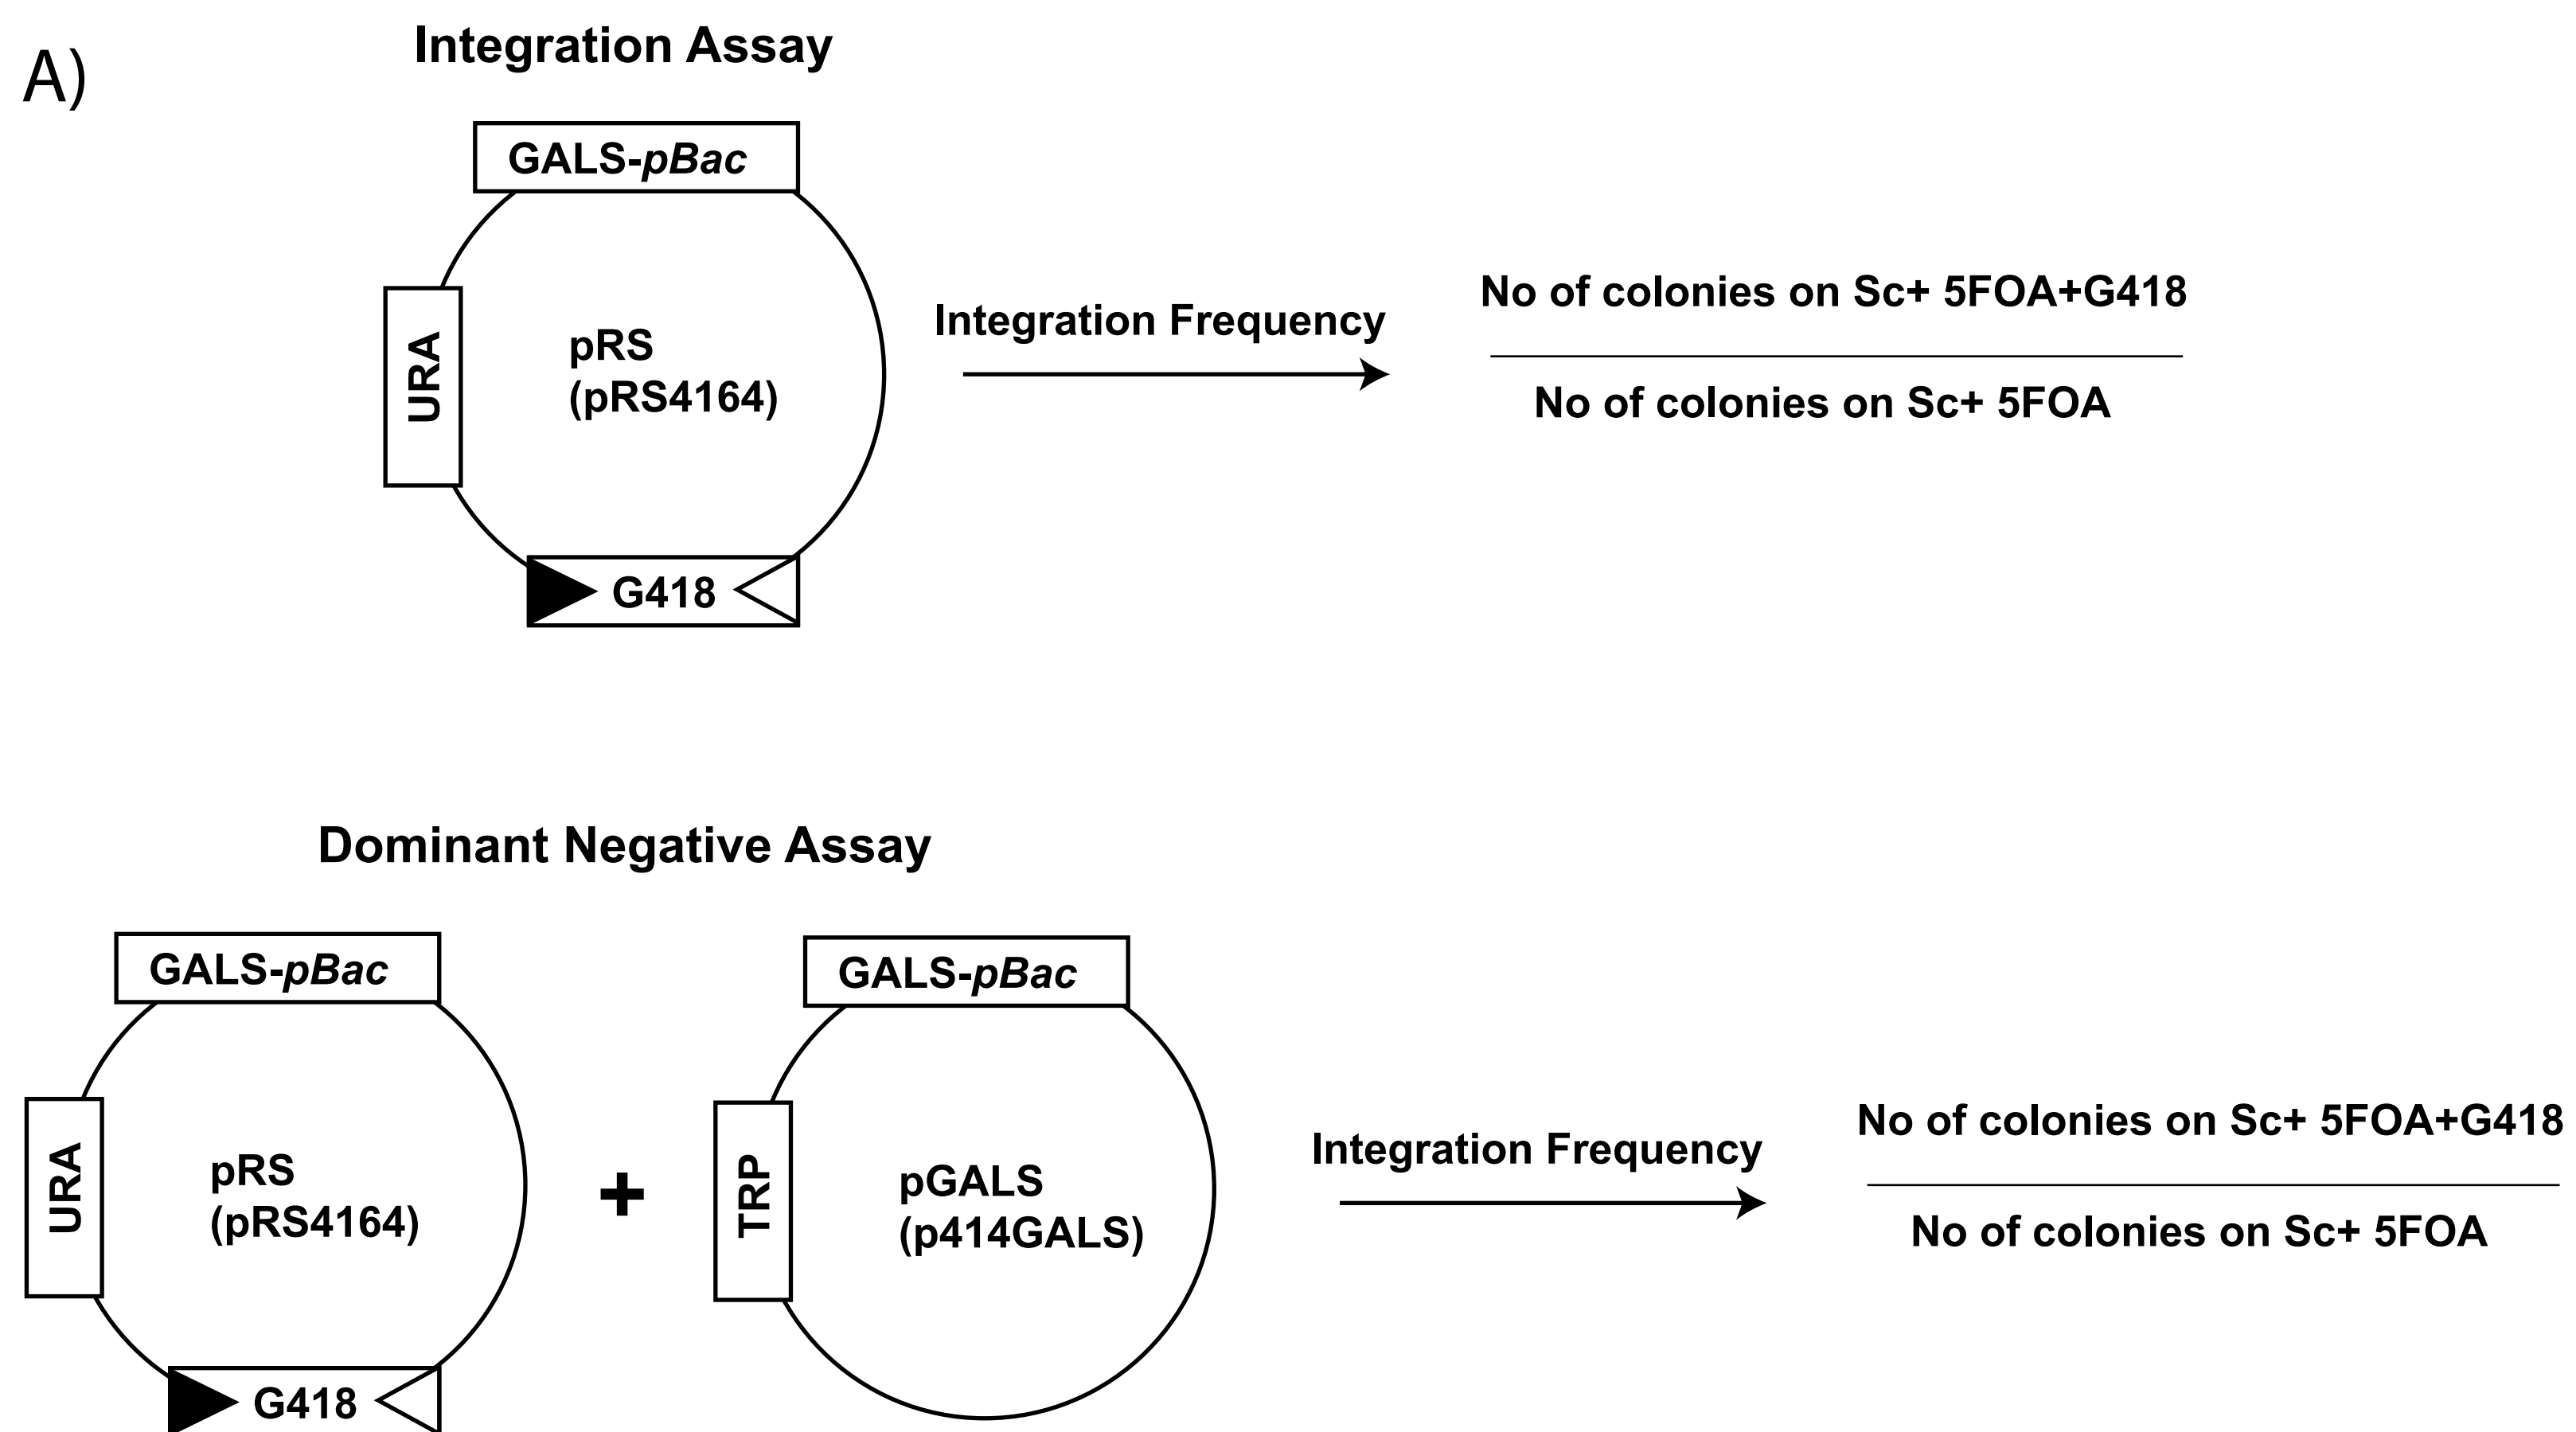

B)

| Transposase plasmid          | Galactose induction | Integration frequency <i>G418<sup>R</sup></i> colonies |
|------------------------------|---------------------|--------------------------------------------------------|
| pRS(no transposase)          | +                   | $<1.0 \times 10^{-7}$                                  |
| pRS-TnspWT                   | +                   | $2.4 \times 10^{-2}$                                   |
| pRS-TnspWT+ pGALS-Tnsp WT    | +                   | $8.1 \times 10^{-3}$                                   |
| pRS-TnspWT+ pGALS-Tnsp D268A | +                   | $6.6 \times 10^{-3}$                                   |
| pRS-TnspWT+ pGALS-Tnsp D346A | +                   | $1.2 \times 10^{-3}$                                   |
| pRS-TnspWT+ pGALS-Tnsp D447A | +                   | $3.3 \times 10^{-3}$                                   |
| pRS-TnspWT+ pGALS-Tnsp W465A | +                   | $6.5 \times 10^{-3}$                                   |
